RESEARCH ARTICLE

# Identification and functional analysis of two alternatively spliced transcripts of *ABSCISIC ACID INSENSITIVE3 (ABI3)* in linseed flax (*Linum usitatissimum* L.)

Yanyan Wang<sup>1</sup>✉, Tianbao Zhang<sup>1</sup>✉, Xiaxia Song<sup>1</sup>, Jianping Zhang<sup>2</sup>, Zhanhai Dang<sup>2</sup>, Xinwu Pei<sup>1\*</sup>, Yan Long<sup>1\*</sup>

**1** MOA Key Laboratory on Safety Assessment (Molecular) of Agri-GMO, Institute of Biotechnology, Chinese Academy of Agricultural Sciences, Beijing, China, **2** Crop Institute, Gansu Academy of Agricultural Sciences, Lanzhou, China

✉ These authors contributed equally to this work.

\* [longyan@caas.cn](mailto:longyan@caas.cn) (YL); [peixinwu@caas.cn](mailto:peixinwu@caas.cn) (XP)

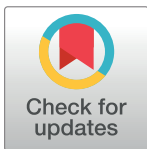

**OPEN ACCESS**

**Citation:** Wang Y, Zhang T, Song X, Zhang J, Dang Z, Pei X, et al. (2018) Identification and functional analysis of two alternatively spliced transcripts of *ABSCISIC ACID INSENSITIVE3 (ABI3)* in linseed flax (*Linum usitatissimum* L.). PLoS ONE 13(1): e0191910. <https://doi.org/10.1371/journal.pone.0191910>

**Editor:** Keqiang Wu, National Taiwan University, TAIWAN

**Received:** October 12, 2017

**Accepted:** January 12, 2018

**Published:** January 30, 2018

**Copyright:** © 2018 Wang et al. This is an open access article distributed under the terms of the [Creative Commons Attribution License](https://creativecommons.org/licenses/by/4.0/), which permits unrestricted use, distribution, and reproduction in any medium, provided the original author and source are credited.

**Data Availability Statement:** All ABI3 sequence files are available from the NCBI database (accession numbers MF964255 to MF964257, and MF964253 to MF964254).

**Funding:** The work was supported by the National Natural Science Foundation of China No.31371657 and the Agricultural Science and Technology Innovation Program in China. The funders had no role in study design, data collection and analysis,

## Abstract

Alternative splicing is a popular phenomenon in different types of plants. It can produce alternative spliced transcripts that encode proteins with altered functions. Previous studies have shown that one transcription factor, *ABSCISIC ACID INSENSITIVE3 (ABI3)*, which encodes an important component in abscisic acid (ABA) signaling, is subjected to alternative splicing in both mono- and dicotyledons. In the current study, we identified two homologs of *ABI3* in the genome of linseed flax. We screened two alternatively spliced flax *LuABI3* transcripts, *LuABI3-2* and *LuABI3-3*, and one normal flax *LuABI3* transcript, *LuABI3-1*. Sequence analysis revealed that one of the alternatively spliced transcripts, *LuABI3-3*, retained a 6 bp intron. RNA accumulation analysis showed that all three transcripts were expressed during seed development, while subcellular localization and transgene experiments showed that *LuABI3-3* had no biological function. The two normal transcripts, *LuABI3-1* and *LuABI3-2*, are the important functional isoforms in flax and play significant roles in the ABA regulatory pathway during seed development, germination, and maturation.

## Introduction

Abscisic acid (ABA) is an important hormone that regulates many aspects of plant growth and development such as the synthesis of seed storage proteins and fatty acids[1], the promotion of drought tolerance and dormancy in seeds, the suppression of seed germination, and the transition from vegetative growth to reproductive growth [2,3]. Previous studies have shown that exogenous ABA could suppress germination of immature embryos [4–6]. Many maize mutants for ABA synthesis, including *vp2*, *vp5*, *vp7*, *vp8*, and *vp9*, have demonstrated that ABA could suppress seed germination [6]. In *Arabidopsis thaliana* and tobacco, ABA-synthesis

decision to publish, or preparation of the manuscript.

**Competing interests:** The authors have declared that no competing interests exist.

mutants lost their dormancy characteristics, indicating that endogenous ABA could suppress seed germination and promote seed dormancy [7,8].

In the ABA signaling pathway, four key regulatory genes, including *LEAFY COTYLEDON1* (*LEC1*), *LEC2*, *FUSCA3* (*FUS3*), and *ABSCISIC ACID INSENSITIVE3* (*ABI3*) [9,10] are partially functionally redundant in the regulation of seed maturation. Of these, *ABI3* is highly conserved among different plant species, including *Arabidopsis*, maize, rice, wheat, tomato, and oat [6]. In *Arabidopsis* lines over-expressing *ABI3*, expression of the seed-specific *At2S3*, *AtEM1*, *AtCRC*, *AtEM6* and *AtSOM* genes was induced by exogenous ABA, with expression in the roots and seeds found to be more sensitive to ABA treatment [11,12].

*ABI3* is a transcription factor belonging to B3 domain-containing gene family. Previous studies have shown that *ABI3* has four domains, A1, B1, B2, and B3, that are conserved in different plants. The A1 domain is an acidic transcriptional activator; the B1 domain is a region needed for interaction with specific bZIP transcription factors such as *ABI5*, *bZIP10*, *bZIP25*, and *TRAB1* [13]; the B2 domain can bind to either ABA response elements or the G-box element (CACGTG) and so could be involved in both transactivation or nuclear localization [14]; and the B3 domain has been shown to bind to the RY motif (CATGCA) in vitro [15].

Alternative splicing is a process that generates multiple proteins from single genes. For eukaryotes, this process is not only an important post-transcriptional regulatory system, it is also an essential mechanism for increasing transcriptome plasticity and proteome diversity. In *Arabidopsis*, approximately 42% of transcripts are alternatively spliced, with the resulting spliced transcripts encoding functionally different or non-functional proteins [16]. For example, one positive regulator of the ABA signaling pathway, *SDIR1*, has three alternative mRNA isoforms, *SDIR1-822*, *SDIR1-691*, and *SDIR1-666*, with the three isoforms having different RNA accumulation levels [17] [19]. Previous studies have found that *ABI3* is alternatively spliced in different crops such as *Arabidopsis* [18] [20], tomato [19] [21], wheat [20], rice [21] [3], and pea [22] [4]. In tomato, two transcripts, *SLABI3-F* and *SLABI3-T*, were found in the genome. *SLABI3-F* encoded a full-length amino acid, while *SLABI3-T* encoded a truncated protein that lacked 30 amino acids. These two transcripts accumulated in the developing seeds and were differentially expressed at different seed development stages. This suggested that the alternative splicing resulting in these two transcripts was developmentally regulated. In wheat, McKibbin et al. (2002) found that early seed germination before harvesting was caused by the incorrect splicing of one alternatively spliced transcript, *vp1* [20] [22]. Furthermore, many truncated *OsVP1* transcripts were found in the rice genome in plants with the same phenotype as the maize *vp1* mutant [21] [23]. In the dicotyledon *Pisum sativum*, many alternatively spliced *ABI3* transcripts, *PsABI3-1*–*PsABI3-7*, were discovered in the genome, with sequence analysis showing that full-length *PsABI3-1* included the basic domains B1 and B3 and was expressed only in seeds [22] [24].

Flax (*Linum usitatissimum* L.) is an economically significant self-pollinated crop in which the stem fiber and seed oil can both be used commercially. The seed oil and protein content are important for linseed flax; seed germination-related traits are, therefore, important in this species. In this study, *ABI3* was identified in flax, with a total of three transcripts, *LuABI3-1*–*3* found in the genome. Sequence analysis revealed that one of the transcripts, *LuABI3-3*, was alternatively spliced and retained a 6 bp intron. RNA accumulation analysis showed that all three transcripts were expressed during seed development, while subcellular localization and transgenic plant experiments showed that *LuABI3-3* had no biological function. The two normal transcripts, *LuABI3-1* and *LuABI3-2*, were the predominant isoforms in flax and played significant roles in the ABA regulatory pathway during seed development, germination, and maturation.

## Materials and methods

### Plant materials

Plants of the linseed flax cultivar Zhangya No.2 were grown in a greenhouse(24°C, 16h light/ 8h dark). The leaves of seedlings were collected for DNA extraction. When the plants flowered, siliques were collected 10, 20, 30, and 40 d after pollination (DAP); roots, stems, and leaves were also harvested for RNA extraction. The *Arabidopsis* ecotype Col-0 was used for gene transformation experiments. *Nicotiana tabacum* was planted for subcellular localization experiments.

### RNA isolation and cDNA synthesis

The coding sequences (CDS) of the *ABI3* transcripts were isolated from linseed flax cv. Zhangya No.2. Total RNA was extracted using the RNeasy Plant Mini Kit (Qiagen) and DNase treated (New England Biolabs) before approximately 2 µg of RNA was reverse transcribed with the oligo-dT primers to obtain first strand cDNA using a cDNA synthesis kit (Applied Biosystems).

The sequence of *Arabidopsis* *ABI3* (*At3g24650*) from the NCBI database was used as the query to blast the flax genome sequence (<https://phytozome.jgi.doe.gov/pz/portal.html>). Two homologs of *ABI3*, *Lus10022820* and *Lus10011888*, were identified in the flax genome. Primers *ABI3F* and *ABI3R* (Table 1), based on the two homologs, were used to isolate the full CDS of flax *ABI3*. The polymerase chain reaction (PCR) products were cloned into the pEasy-T1 cloning vector (Transgene, China), sequenced, and analyzed using Vector NTI Advance 11 software. For each PCR product, five clones were sequenced by the Tsing Company, China.

### DNA isolation and genomic sequence identification

As with the cDNA sequences described above, full-length genomic sequences were obtained from linseed flax cv. Zhangya No.2. Total genomic DNA was extracted from seedling leaves using the extraction method of Murray and Thompson (1980) [23]. To obtain genomic sequences, PCR amplifications were performed using the total genomic DNA and the *ABI3.gF/ABI3.gR* primers (Table 1). The primers were designed based on the transcript sequences. After PCR amplification, the amplicons were cloned into the pEasy-T1 cloning vector, sequenced, and analyzed using Vector NTI Advance 11 software.

**Table 1. Primer sequences for *LuABI3* gene cloning and expression analysis.**

| Code             | Primer name     | Primer sequence (5'-3')  |                        |
|------------------|-----------------|--------------------------|------------------------|
| Cloning          | <i>ABI3 F</i>   | ATGCATGAAGAAGAAGATCTCT   |                        |
|                  | <i>ABI3 R</i>   | TTAGACTCGGGATTTTATCTGT   |                        |
|                  | <i>ABI3.gF</i>  | ATGCATGAAGAAGAAGATCTCTAT |                        |
|                  | <i>ABI3.g R</i> | TTATCTGTATGTATCGAGTTGTTG |                        |
| RNA accumulation | 1               | <i>LuABI3-1.1F</i>       | TAATCATCACAAACCCGGCGT  |
|                  |                 | <i>LuABI3-1.1R</i>       | TCCCTGCTTCTGATGGTTCTGA |
|                  | 2               | <i>LuABI3-2.1F</i>       | CAATCATCACACTACCGGCGC  |
|                  |                 | <i>LuABI3-2.1R</i>       | GTCGATCCACCGTCTGCA     |
|                  | 3               | <i>LuABI3-3.1F</i>       | TCTCAGATTCTGGCCCAACA   |
|                  |                 | <i>LuABI3-3.1R</i>       | GCTGCCTTCTTGTCTCAGGC   |
|                  | 4               | <i>LuActinF</i>          | GGCATCCACGAGACCACTTA   |
|                  |                 | <i>LuActinR</i>          | GGACCCCTCCAATCCAGACAC  |

<https://doi.org/10.1371/journal.pone.0191910.t001>

### ***LuABI3* expression analysis in flax tissues**

Quantitative real-time PCR (qRT-PCR) analysis was used to analyze the RNA accumulation patterns of the different *LuABI3* transcripts. cDNA derived from siliques harvested 10, 20, 30, and 40 DAP, and also from roots, stems, and leaves was used. Transcript-specific primers were designed based on the transcript sequences (Table 1). The six bases “TCTCAG” were added to the 5′ end of the *LuABI3*-3.1F primer to specifically amplify the *LuABI3*-3 fragment. Before being used in qRT-PCR, the qRT-PCR primers were first checked using normal PCR amplification and sequencing of the PCR products to confirm that the primers were transcript-specific. qRT-PCR was conducted using the ABI7500 Fast Real-time PCR system (Applied Biosystems). In our previous study, we used high-throughput sequencing technology to do RNA-seq for four tissues in four developing stages and found Actin gene could stably express in all the samples. So the *LuActin* (EU830342) gene used as a reference gene to normalize the gene expression. The efficiencies of all target genes (*LuABI3-1* to *LuABI3-3*) and Actin were determined by using a validation method as Banik described [24]. The cDNA was serially diluted (50, 25, 12.5, 6.25 and 3.125 ng) and each cDNA was amplified by real-time PCR with the gene-specific primers using the SYBR green method. Each dilution was replicated three times. The mean of three replications was used in determining the absolute value of the slope of log(input amount) versus  $\Delta\text{CT}$ . For each gene, three independent PCR reactions were applied for each sample, and  $2^{-\Delta\Delta\text{Ct}}$  method was used to calculate the gene relative expression values.

### **Subcellular localization of *LuABI3***

For subcellular analysis, the complete open reading frame of the three *LuABI3* transcripts was amplified using primers 35s-ABI3-GFP-InF (5′-GACCGGTCCCGGGGATCCATGGGAATCGA CCCGTTT-3′) and 35s-ABI3-GFP-InR (5′-CCTTGCTCACCATGGATCCTCTGTATGTATCGA GTTGTGGGA-3′) that incorporated *Bam*HI restriction sites at both ends of the product. The amplified PCR fragments were cloned into the binary vector pCAMBIA1305-35s-GFP to generate 35S::*LuABI3*-GFP fusion constructs. These constructs were transformed into *Agrobacterium tumefaciens* strain EHA105 using the freeze–thaw method, and these transformed *Agrobacterium* strains were infiltrated into the leaves of 4- to 6-w-old tobacco plants as described by Sparkes et al. (2006). Microscopic analysis was performed 2–3 d post-infiltration using the confocal laser scanning microscope ZEISS LSM 800 system.

### **Vector construction and gene transformation**

To develop *LuABI3* overexpression constructs, the CDSs of the *LuABI3-1–3* transcripts were cloned into the pBinGlyRed3 vector. The plasmids were double digested with the restriction endonuclease *Eco*RI and *Xma*I and the framework was then ligated with the specific transcript fragment so that *LuABI3-1–3* expression was under the control of the CaMV 35S promoter. The constructs were transformed to *Agrobacterium* strain EHA105 using the freeze–thaw method. *Arabidopsis* Col-0 plants were then transformed using the floral dip method [25][26], with untransformed *Arabidopsis* plants used as wild-type (WT) controls. Transgenic plants were selected on MS medium supplemented with kanamycin.

### **Phenotypic screening and RNA accumulation analysis of transgenic plants**

For phenotypic screening, approximately 200 WT and T2 homozygous transgenic seeds were sown on 1/2 MS medium plates containing 2% sucrose and different concentrations (0, 0.3, 0.5, 1.0, 2.0, and 3.0  $\mu\text{M}$ ) of ABA. Three replicates were used for each line. All plates were kept

in a greenhouse under standard conditions (24°C day/18°C night; 16 h light/8 h dark). Plant phenotypes were observed after 16 d growth. In addition to the phenotype screening, whole tissue of transgenic *Arabidopsis* plants treated with 2 μM ABA was harvested for RNA isolation. Total RNA was extracted using the RNeasy Plant Mini Kit (Qiagen) as previously described. The expression of the seed germination-related genes *AtEM1*, *AtEM6*, and *AtSOM* was analyzed in the transgenic *Arabidopsis* lines using primers listed in [S1 Table](#) and qRT-PCR as previously described. The expression level was normalized to the *Arabidopsis ACTIN* (*At5g62690*) control gene, and  $2^{-\Delta\Delta C_t}$  method was used to calculate the relative expression values. Three biological replicates and two technical replicates were used for each gene.

## Results

### Identification of *LuABI3* coding and genomic sequences in linseed flax

PCR amplification, sequencing, and sequence analysis led to the identification of three *LuABI3* CDSs. The CDSs were 2106 bp (accession number MF964255), 2124 bp (accession number MF964256), and 2030 bp (accession number MF964257) long and were named *LuABI3-1*, *LuABI3-2*, and *LuABI3-3*, respectively. Blast analysis showed that the *LuABI3-1* sequence was highly homologous to the known sequence *Lus10022820*, and *LuABI3-2* and *LuABI3-3* were highly homologous to *Lus10011888*. Primers to amplify the genomic sequences of these transcripts were designed according to the CDS. After PCR amplification and sequencing, two corresponding genomic sequences were obtained with lengths of 2661 bp and 2681 bp, respectively (accession number MF964253 and MF964254). Structural comparative analysis of the genomic and transcript sequences showed that the *LuABI3* gene had six exons and five introns; both *LuABI3-2* and *LuABI3-3* had the corresponding genomic sequence were 2681 bp long. Compared with *LuABI3-1*, *LuABI3-2* and *LuABI3-3* had three insertions in exon 1 and exon 6 ([Fig 1](#)). We also identified *LuABI3-3* transcripts with a 6 bp insertion in intron 3 when compared with *LuABI3-2*, indicating that this 6 bp intron sequence was not correctly spliced after transcription in *LuABI3-3*. We concluded, therefore, that *LuABI3-2* and *LuABI3-3* were alternative transcripts formed by alternative splicing.

Based on these three transcript sequences, deduced protein sequences were determined ([Fig 1](#)). The deduced proteins for *LuABI3-1–3* were 701, 707, and 709 aa, respectively. Domain analysis showed that the three proteins had all four of the *ABI3* conserved domains, including A1, B1, B2, and B3 ([Fig 1](#)).

### Analysis of *LuABI3* transcripts expression

qRT-PCR analysis was used to analyze the RNA accumulation pattern of these three transcripts. In order to ensure the similar amplification efficiencies for all the transcripts relative to the reference gene, the validation experiments were performed. The results showed that the absolute value of the slope versus  $\Delta C_t$  was  $<0.1$ , indicating that the amplification efficiencies of *Actin* and all the *LuABI3* transcripts were similar. Then the expression values of all the three transcripts were calculated. It was found that the three transcripts expressed in all the tissues examined, including roots, stems, leaves, and siliques at different developmental stages ([Fig 2](#)). *LuABI3-1* was stably expressed in roots, shoots, leaves, and siliques at different developmental stages. *LuABI3-2* and *LuABI3-3* were stably expressed in roots, shoots, and leaves. In the developing siliques, *LuABI3-2* expression increased as development progressed, with the highest expression observed 40 DAP, where its expression was 66-fold higher than that of *LuABI3-1*. *LuABI3-3* expression increased from DAP10 to DAP30 and was stable from DAP30 to DAP40.

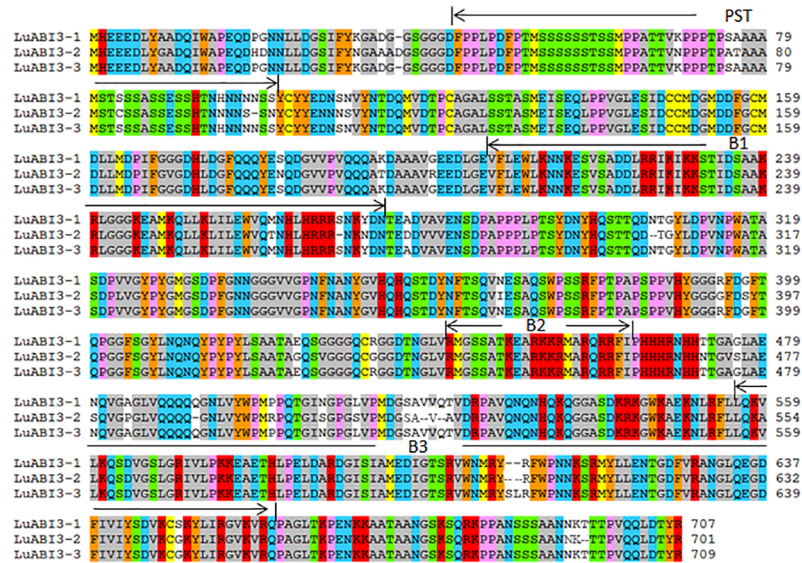

**Fig 1. Deducing proteins comparison for LuABI3.** The PST, B1, B2 and B3 represented the four domains of the LuABI3.

<https://doi.org/10.1371/journal.pone.0191910.g001>

### Subcellular localization of LuABI3

Transient expression studies in tobacco showed that constructs containing LuABI3-1 and LuABI3-2 produced a fluorescent signal. As expected, the two gene products could be detected in the cell nucleus, while the gene product of LuABI3-3 had no signal (Fig 3). This indicates that LuABI3-1 and LuABI3-2 had normal gene function in linseed flax, while LuABI3-3 was non-functional.

### Phenotypic analysis of transgenic *Arabidopsis* plants

Both WT and transgenic plants grew normally in the ABA-free medium, and the transgenic plants grew normally in both 0.3 μM and 0.5 μM ABA medium (Fig 4). When the ABA concentration increased to 1 μM, the transgenic plants overexpressing *LuABI3-1* and *LuABI3-2* grew better than the WT plants, while for the *LuABI3-3* transgenic plants, the leaves were wrinkled and the plants were weaker than the control plants. With an ABA concentration of

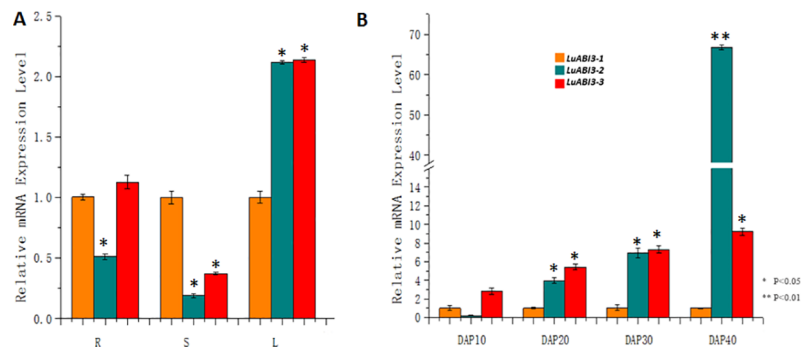

**Fig 2. RNA accumulation analyses of three transcripts of *LuABI3*.** (A) Expression pattern of different transcripts in the root (R), shoot (S), and leaf (L) of zhangya2. (B) Expression pattern of different *LuABI3* transcripts at different developmental stages.

<https://doi.org/10.1371/journal.pone.0191910.g002>

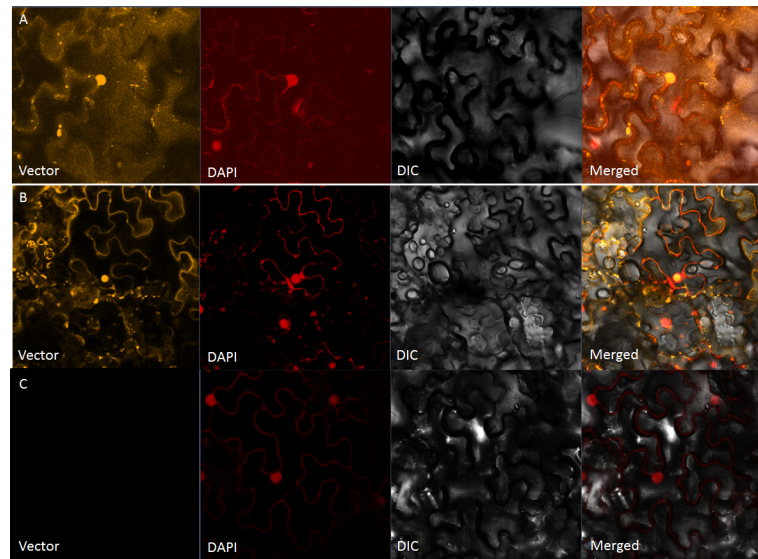

**Fig 3. The subcellular localization results of LuABI3.** (A) The subcellular localization result of LuABI3-1. (B) The subcellular localization result of LuABI3-2. (C) The subcellular localization result of LuABI3-3.

<https://doi.org/10.1371/journal.pone.0191910.g003>

2  $\mu$ M, the leaves of the overexpressing *LuABI3-1* and *LuABI3-2* resulting plants were green and plant growth was inhibited.

Conversely, the germinated WT plants become yellow and then gradually died, as did the transgenic plants overexpressing *LuABI3-3*. With an ABA concentration of 3  $\mu$ M, parts of the transgenic plants overexpressing *LuABI3-1* and *LuABI3-2* survived, while all the plants overexpressing *LuABI3-3* and the WT plants died. These results showed that the optimal concentration for the survival of LuABI3 transgenic plants was 2  $\mu$ M and that *LuABI3-3* did not function in the ABA signaling pathway.

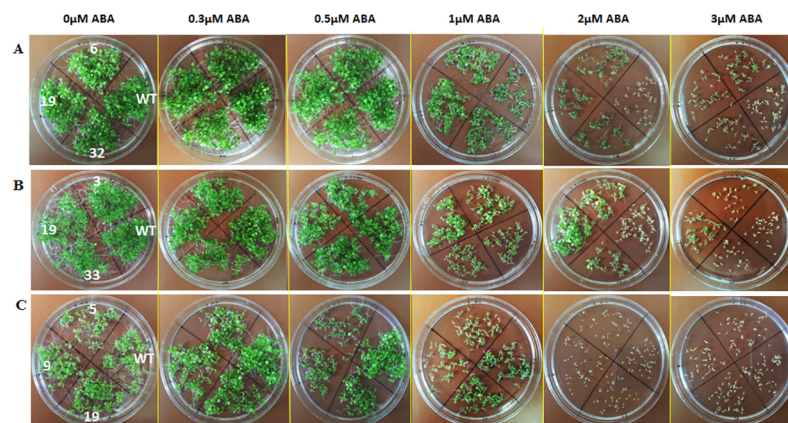

**Fig 4. Phenotypic analysis of transgenic T2 *Arabidopsis* plants and WT treated with different concentrations of ABA.** For each of the vector, seeds of three transgenic lines were selected for sowed in the petri dishes, also the seeds of WT plants were sowed. The numbers with black characters represented the three lines. The characters WT mean the wild type. (A) Phenotypic analysis of 35s:LuABI3-1 and WT plants. The three transgenic lines were line6, line19 and line32. (B) Phenotypic analysis of 35s:LuABI3-2 and WT plants. The three transgenic lines were line3, line19 and line33. (C) Phenotypic analysis of 35s:LuABI3-3 and WT plants. The three transgenic lines were line5, line9 and line19.

<https://doi.org/10.1371/journal.pone.0191910.g004>

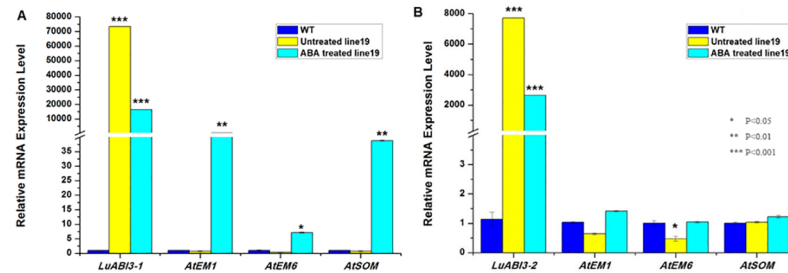

**Fig 5. Expression analysis of three seed development-related genes in transgenic *Arabidopsis* plants.** (A) Gene expression analysis in Line19 (with the 35s:LuABI3-1 construct) and WT plants. For *LuABI3-1* gene expression, the expression value was higher in the transgenic plants than that in WT plants. Expression values of *EM1*, *EM6* and *SOM* in the ABA treated plants was higher than that in untreated plants. (B) Gene expression analysis in Line19 (with the 35s:LuABI3-2 construct) and WT plants. For *LuABI3-2* gene expression, the expression value was higher in the transgenic plants than that in WT plants.

<https://doi.org/10.1371/journal.pone.0191910.g005>

### Expression of seed germination-related genes in transgenic plants

As all the transgenic plants overexpressing *LuABI3-3* died after ABA treatment, RNA accumulation analysis was done using samples from transgenic plants overexpressing *LuABI3-1* and *LuABI3-2* and the WT control plants (Fig 5). For the ABA-untreated plants, *LuABI3-1* and *LuABI3-2* were expressed more highly in the transgenic plants overexpressing *LuABI3-1* and *LuABI3-2* than in the WT plants, indicating that both transcripts were successfully integrated into the *Arabidopsis* plants. In the plants treated with 2  $\mu$ M ABA, expression of both *LuABI3-1* and *LuABI3-2* was lower than in the corresponding untreated plants. This indicated that exogenous ABA negatively regulated expression of *LuABI3*. Then expression of three other seed germination-related genes, *AtEM1*, *AtEM6*, and *AtSOM* were compared between the ABA treated and untreated plants for both *LuABI3-1* and *LuABI3-2* vectors. The results showed that the expression in treated plants were higher than that in the corresponding untreated plants in overexpressing *LuABI3-1* plants. And in the overexpressing *LuABI3-2* plants, the expression of the three genes didn't have significant difference between treated and control plants. This indicated that the expression of *AtEM1*, *AtEM6*, and *AtSOM* was positively regulated by exogenous ABA, and the *LuABI3-1* and *LuABI3-2* may have sub-functions in controlling the seed germination process.

### Discussion

As a diploid crop, flax underwent a whole-genome duplication event about 5–9 million years ago, after its divergence from poplar and castor bean [26]. That means that there are many duplicate genes in the flax genome. For example, Shivaraj et al. (2017) identified 51 aquaporin genes in the flax genome, many of which were duplicate genes [27]. In the current study, blast analysis of public flax genome data revealed the presence of two homologous *LuABI3* genes, *Lus10011888* and *Lus10022820*. Gene annotation showed that the CDS length of these genes was 2130 bp and 1125 bp, respectively. Careful analysis revealed that the assembled *Lus10022820* CDS lacked the upstream sequence. Next, two actual *LuABI3* genes were identified in flax genome, with homology analysis showing that these two genes were associated with *Lus10011888* and *Lus10022820*, respectively. Structural analysis showed that, like the gene structure of *ABI3* in *Arabidopsis*, the two flax homologous genes had 6 exons and 5 introns, including the A1, B1, B2 and B3 domains and the PST domain. These four domains have been confirmed to be conserved in members of the *ABI3/VP1* subfamily of the B3-domain protein family [28]. Comparison of the two genomic and three transcript sequences revealed that the



three transcripts could be divided into two groups, corresponding to the two genomic sequences.

Previous studies showed that alternative splicing commonly exists in *ABI3* in different crops. For example, two splicing isoforms, *ABI3- $\alpha$*  and *ABI3- $\beta$* , have been found *Arabidopsis* [29], while *SlABI3-F* and *SlABI3-T* have been found in tomato [19]. We hypothesized, therefore, that *LuABI3-2* and *LuABI3-3* were alternatively spliced transcripts, with *LuABI3-3* retaining a 6 bp intron. The mechanism of splicing was, therefore, intron retention. Previous studies have shown that there are four types of alternative splicing events in *Arabidopsis*: exon skipping/inclusion, an alternative 5' splice site, an alternative 3' splice site and intron retention. Of these, intron retention was the most frequent type, responsible for up to 40% of the alternatively spliced transcript in the genome [30]. Many alternatively spliced transcripts in different crops are non-functional, including *SlABI3-T* in tomato [19]. This lack of functionality is often a result of non-functional protein isoforms, such as truncated proteins, formed from alternatively spliced transcripts with frameshifts resulting in premature stop codons.

The RNA accumulation results obtained in this study showed that *LuABI3-1-3* were expressed in a range of different tissues, including roots, stems, leaves, and developing seeds. It is important for choosing suitable reference gene for qRT-PCR analysis to detect the RNA accumulation. In previous studies, different researchers selected different gene as reference gene in flax. For example, Huis found that *GADPH* and 2 *TEF* genes could be used as reference genes for evaluating RNA accumulation values based on different analysis methods [31]. While Fernart et al., selected *c3168* and *c10916* as reference genes based on their micro array analysis [32]. In the current study, we selected *Actin* gene as a reference gene because it was found that *Actin* could stably express in four tissues from four developing stages by using high-throughput sequencing technology. After selecting reference genes, the PCR efficiencies were detected first to confirm the consistent PCR amplification for target genes and reference gene. The qRT-PCR experiments showed that three transcripts had different expression patterns in developing seeds, with *LuABI3-2* having much higher expression than *LuABI3-1*. This suggests that these two transcripts may have different sub-functions during seed development. This is consistent with different homologous genes having sub-functions in regulating one specific biological process, particularly in polyploid plants. For example, there are, generally, six homologous genes in the genome of a polyploid crop plant such as *Brassica napus* compared with the model plant *Arabidopsis* because of the polyploidization process; Zou et al. (2012) identified six *BnFLC* homologs in *B. napus* genome. RNA accumulation experiments using these homologs showed that each had distinct expression patterns in different organs at different developmental stages [33]. Although the alternatively spliced *LuABI3-3* transcript was expressed in different tissues, the subcellular localization and transgenic plant experiments showed that this transcript had no biological function.

*ABI3* is a core regulator of the ABA signaling pathway. It has been confirmed that exogenous ABA can mediate *ABI3* degradation via several regulators, allowing seeds to germinate [11,34]. For example, Gao et al., (2014) identified two wheat *AIP2* genes that could negatively regulate *ABI3* and *ABI5* in the ABA signaling pathway and were found to have important roles in seed germination [34]. To dissect the biological function of *LuABI3*, the expression of *LuABI3-1* and *LuABI3-2* was examined in transgenic plants overexpressing *LuABI3-1* and *LuABI3-2* and WT control plants. Their expression was consistently lower in ABA-treated plants than in plants without ABA treatment. This result was consistent with previous studies and suggests that the flax *ABI3* genes are sensitive to exogenous ABA and that their encoded proteins may be degraded with ABA treatment. Meanwhile, three seed germination-related genes *AtEM1*, *AtEM6*, and *AtSOM*, were more highly expressed in the transgenic plants with ABA treatment than without ABA treatment. Overall, these results demonstrate that the *ABI3*

genes *LuABI3-1* and *LuABI3-2* in linseed flax function in regulating seed germination and dormancy and that the expression of these genes is dependent on ABA and independent of these two *LuABI3* genes.

## Supporting information

**S1 Table. Primer sequences for expression analysis of seed development related genes.** (XLSX)

## Acknowledgments

We thank Emma Tacken, PhD from Liwen Bianji, Edanz Group China ([www.liwenbianji.cn/ac](http://www.liwenbianji.cn/ac)) for editing the English test of a draft of this manuscript.

## Author Contributions

**Data curation:** Xi Xia Song.

**Formal analysis:** Tianbao Zhang.

**Methodology:** Yanyan Wang.

**Project administration:** Xinwu Pei, Yan Long.

**Resources:** Jianping Zhang, Zhanhai Dang.

**Validation:** Xi Xia Song.

**Writing – original draft:** Yanyan Wang.

**Writing – review & editing:** Zhanhai Dang, Yan Long.

## References

1. Finkelstein RR, Tenberge KM, Shumway JE, Crouch ML. Role of ABA in maturation of rapeseed embryos. *Plant Physiol.* 1985; 78(3):630–6. PMID: [16664296](https://pubmed.ncbi.nlm.nih.gov/16664296/); PubMed Central PMCID: PMC1064789.
2. Giraudat J, Hauge BM, Valon C, Smalle J, Parcy F, Goodman HM. Isolation of the Arabidopsis *ABI3* gene by positional cloning. *Plant Cell.* 1992; 4(10):1251–61. <https://doi.org/10.1105/tpc.4.10.1251> PMID: [1359917](https://pubmed.ncbi.nlm.nih.gov/1359917/); PubMed Central PMCID: PMC160212.
3. Rock CD. Pathways to abscisic acid-regulated gene expression. *New Phytologist.* 2000; 148(3):357–96. <https://doi.org/10.1046/j.1469-8137.2000.00769.x> WOS:000166496000002.
4. Hoecker U, Vasil IK, McCarty DR. Integrated control of seed maturation and germination programs by activator and repressor functions of Viviparous-1 of maize. *Genes Dev.* 1995; 9(20):2459–69. PMID: [7590227](https://pubmed.ncbi.nlm.nih.gov/7590227/).
5. Leung J, Giraudat J. Abscisic acid signal transduction. *Annu Rev Plant Phys.* 1998; 49:199–222. <https://doi.org/10.1146/annurev.arplant.49.1.199> WOS:000074266700010. PMID: [15012233](https://pubmed.ncbi.nlm.nih.gov/15012233/)
6. Finkelstein RR, Gampala SSL, Rock CD. Abscisic acid signaling in seeds and seedlings. *Plant Cell.* 2002; 14:S15–S45. <https://doi.org/10.1105/tpc.010441> WOS:000176187500004. PMID: [12045268](https://pubmed.ncbi.nlm.nih.gov/12045268/)
7. LeonKloosterziel KM, Gil MA, Ruijs GJ, Jacobsen SE, Olszewski NE, Schwartz SH, et al. Isolation and characterization of abscisic acid-deficient *Arabidopsis* mutants at two new loci. *Plant J.* 1996; 10(4):655–61. <https://doi.org/10.1046/j.1365-313X.1996.10040655.x> WOS:A1996VN08700008. PMID: [8893542](https://pubmed.ncbi.nlm.nih.gov/8893542/)
8. Marin E, Nussaume L, Quesada A, Gonneau M, Sotta B, Huguency P, et al. Molecular identification of zeaxanthin epoxidase of *Nicotiana glauca*, a gene involved in abscisic acid biosynthesis and corresponding to the ABA locus of *Arabidopsis thaliana*. *The EMBO journal.* 1996; 15(10):2331–42. PMID: [8665840](https://pubmed.ncbi.nlm.nih.gov/8665840/); PubMed Central PMCID: PMC450162.
9. Kroj T, Savino G, Valon C, Giraudat J, Parcy F. Regulation of storage protein gene expression in *Arabidopsis*. *Development.* 2003; 130(24):6065–73. <https://doi.org/10.1242/dev.00814> PMID: [14597573](https://pubmed.ncbi.nlm.nih.gov/14597573/).

10. To A, Valon C, Savino G, Guillemot J, Devic M, Giraudat J, et al. A network of local and redundant gene regulation governs *Arabidopsis* seed maturation. *Plant Cell*. 2006; 18(7):1642–51. <https://doi.org/10.1105/tpc.105.039925> WOS:000238960500009. PMID: 16731585
11. Zhang XR, Garretton V, Chua NH. The AIP2 E3 ligase acts as a novel negative regulator of ABA signaling by promoting ABI3 degradation. *Gene Dev*. 2005; 19(13):1532–43. <https://doi.org/10.1101/gad.1318705> WOS:000230334600004. PMID: 15998807
12. Park J, Lee N, Kim W, Lim S, Choi G. ABI3 and PIL5 collaboratively activate the expression of SOM-NUS by directly binding to its promoter in imbibed *Arabidopsis* seeds. *Plant Cell*. 2011; 23(4):1404–15. <https://doi.org/10.1105/tpc.110.080721> PMID: 21467583; PubMed Central PMCID: PMC3101561.
13. McCarty DR, Hattori T, Carson CB, Vasil V, Lazar M, Vasil IK. The Viviparous-1 developmental gene of maize encodes a novel transcriptional activator. *Cell*. 1991; 66(5):895–905. PMID: 1889090.
14. Ezcurra I, Wycliffe P, Nehlin L, Ellerstrom M, Rask L. Transactivation of the *Brassica napus* napin promoter by ABI3 requires interaction of the conserved B2 and B3 domains of ABI3 with different cis-elements: B2 mediates activation through an ABRE, whereas B3 interacts with an RY/G-box. *Plant J*. 2000; 24(1):57–66. <https://doi.org/10.1046/j.1365-313x.2000.00857.x> WOS:000089935800006. PMID: 11029704
15. Suzuki M, Kao CY, McCarty DR. The conserved B3 domain of VIVIPAROUS1 has a cooperative DNA binding activity. *Plant Cell*. 1997; 9(5):799–807. WOS:A1997WZ63100012. <https://doi.org/10.1105/tpc.9.5.799> PMID: 9165754
16. Filichkin SA, Priest HD, Givan SA, Shen RK, Bryant DW, Fox SE, et al. Genome-wide mapping of alternative splicing in *Arabidopsis thaliana*. *Genome Res*. 2010; 20(1):45–58. <https://doi.org/10.1101/gr.093302.109> WOS:000273249500006. PMID: 19858364
17. Xiao LW, Tang X, Q., LiXia Yu Y Y. L., Yan B. Alternative splicing of *SDIR1* gene in *Arabidopsis thaliana* (Cruciferae). *Acta Botanica Yunnanica* 2010; 32(2):141–6.
18. Bies-Etheve N, da Silva Conceicao A, Giraudat J, Koornneef M, Leon-Kloosterziel K, Valon C, et al. Importance of the B2 domain of the *Arabidopsis* ABI3 protein for Em and 2S albumin gene regulation. *Plant molecular biology*. 1999; 40(6):1045–54. PMID: 10527428.
19. Gao Y, Liu J, Zhang Z, Sun X, Zhang N, Fan J, et al. Functional characterization of two alternatively spliced transcripts of tomato *ABSCISIC ACID INSENSITIVE3* (*ABI3*) gene. *Plant molecular biology*. 2013; 82(1–2):131–45. <https://doi.org/10.1007/s11103-013-0044-1> PMID: 23504452.
20. McKibbin RS, Wilkinson MD, Bailey PC, Flintham JE, Andrew LM, Lazzeri PA, et al. Transcripts of Vp-1 homeologues are misspliced in modern wheat and ancestral species. *Proceedings of the National Academy of Sciences of the United States of America*. 2002; 99(15):10203–8. <https://doi.org/10.1073/pnas.152318599> PMID: 12119408; PubMed Central PMCID: PMC126648.
21. Fan J, Niu X, Wang Y, Ren G, Zhuo T, Yang Y, et al. Short, direct repeats (SDRs)-mediated post-transcriptional processing of a transcription factor gene OsVP1 in rice (*Oryza sativa*). *Journal of experimental botany*. 2007; 58(13):3811–7. <https://doi.org/10.1093/jxb/erm231> WOS:000251506300027. PMID: 18057047
22. Gagete AP, Riera M, Franco L, Rodrigo MI. Functional analysis of the isoforms of an ABI3-like factor of *Pisum sativum* generated by alternative splicing. *Journal of experimental botany*. 2009; 60(6):1703–14. <https://doi.org/10.1093/jxb/erp038> WOS:000265524400015. PMID: 19261920
23. Murray MG, Thompson WF. Rapid isolation of high molecular weight plant DNA. *Nucleic Acids Res*. 1980; 8(19):4321–5. PMID: 7433111; PubMed Central PMCID: PMC324241.
24. Banik M, Duguid S, Cloutier S. Transcript profiling and gene characterization of three fatty acid desaturase genes in high, moderate, and low linolenic acid genotypes of flax (*Linum usitatissimum* L.) and their role in linolenic acid accumulation. *Genome*. 2011; 54(6):471–83. <https://doi.org/10.1139/g11-013> WOS:000291994900004. PMID: 21627464
25. Clough SJ, Bent AF. Floral dip: a simplified method for *Agrobacterium*-mediated transformation of *Arabidopsis thaliana*. *Plant J*. 1998; 16(6):735–43. PMID: 10069079.
26. Wang ZW, Hobson N, Galindo L, Zhu SL, Shi DH, McDill J, et al. The genome of flax (*Linum usitatissimum*) assembled de novo from short shotgun sequence reads. *Plant J*. 2012; 72(3):461–73. <https://doi.org/10.1111/j.1365-313X.2012.05093.x> WOS:000310343200010. PMID: 22757964
27. Shivaraj SM, Deshmukh RK, Rai R, Belanger R, Agrawal PK, Dash PK. Genome-wide identification, characterization, and expression profile of aquaporin gene family in flax (*Linum usitatissimum*). *Scientific reports*. 2017; 7:46137. <https://doi.org/10.1038/srep46137> PMID: 28447607; PubMed Central PMCID: PMC5406838.
28. Finkelstein RR, Gampala SS, Rock CD. Abscisic acid signaling in seeds and seedlings. *Plant Cell*. 2002; 14 Suppl:S15–45. <https://doi.org/10.1105/tpc.010441> PMID: 12045268; PubMed Central PMCID: PMC151246.

29. Sugliani M, Brambilla V, Clerckx EJ, Koornneef M, Soppe WJ. The conserved splicing factor SUA controls alternative splicing of the developmental regulator *ABI3* in *Arabidopsis*. *Plant Cell*. 2010; 22(6):1936–46. <https://doi.org/10.1105/tpc.110.074674> PMID: 20525852; PubMed Central PMCID: PMC2910958.
30. Reddy AS, Marquez Y, Kalyna M, Barta A. Complexity of the alternative splicing landscape in plants. *Plant Cell*. 2013; 25(10):3657–83. <https://doi.org/10.1105/tpc.113.117523> PMID: 24179125; PubMed Central PMCID: PMC3877793.
31. Huis R, Hawkins S, Neutelings G. Selection of reference genes for quantitative gene expression normalization in flax (*Linum usitatissimum* L.). *BMC plant biology*. 2010; 10:71. <https://doi.org/10.1186/1471-2229-10-71> PMID: 20403198; PubMed Central PMCID: PMC3095345.
32. Fenart S, Ndong Y-PA, Duarte J, Rivière N, Wilmer J, van Wuytswinkel O, et al. Development and validation of a flax (*Linum usitatissimum* L.) gene expression oligo microarray. *BMC genomics*. 2010; 11:592–. <https://doi.org/10.1186/1471-2164-11-592> PMC3091737. PMID: 20964859
33. Zou X, Suppanz I, Raman H, Hou J, Wang J, Long Y, et al. Comparative analysis of *FLC* homologues in *Brassicaceae* provides insight into their role in the evolution of oilseed rape. *PloS one*. 2012; 7(9): e45751. <https://doi.org/10.1371/journal.pone.0045751> PMID: 23029223; PubMed Central PMCID: PMC3459951.
34. Gao DY, Xu ZS, He Y, Sun YW, Ma YZ, Xia LQ. Functional analyses of an E3 ligase gene *AIP2* from wheat in *Arabidopsis* revealed its roles in seed germination and pre-harvest sprouting. *Journal of integrative plant biology*. 2014; 56(5):480–91. <https://doi.org/10.1111/jipb.12135> PMID: 24279988.
